# Supplementary material for: 1-Phosphino-2-sulfenylferrocenes: efficient ligands in enantioselective palladium-catalyzed allylic substitutions and ring opening of 7-oxabenzonorbornadienes
Source: Royal Society of Chemistry journal article supplement (doi:10.1039/b207344g), 2002-01-01
Supplement: b207344g.doc [file b207344g.doc]

**Supporting Information for**

**1-Phosphino-2-sulfenylferrocenes: Efficient Ligands in Enantioselective Palladium-Catalyzed Allylic Substitutions and Ring Opening of 7-Oxabenzonorbornadienes**

Julián Priego, Olga García Mancheño, Silvia Cabrera, Ramón Gómez Arrayás, Tomás Llamas, Juan C. Carretero*

Departamento de Química Orgánica. Facultad de Ciencias. Universidad Autónoma de Madrid. 28049. Madrid. Spain

**General Methods**

Melting points are uncorrected. 1H NMR spectra were acquired at 200 or 300 MHz and 13C NMR were acquired at 50 or 75 MHz (indicated in each case). Chemical shifts (are reported in ppm relative to CDCl3 (7.26 and 77.0 ppm). For phosphorus containing compounds the observed list of peaks is given as 13C NMR data, except for those cases where the *J*P-C has been unequivocally determined. Mass spectra (MS) were determined at an ionizing voltage of 70 eV. All reactions were carried out in anhydrous solvents and under argon atmosphere. THF was distilled from sodium-benzophenone under argon. CH2Cl2 was distilled from P2O5. Flash column chromatography was performed using silica gel Merk-60 (230-400 mesh). Et2Zn (1M solution in hexanes) and Me2Zn (2M solution in toluene) were purchased from Aldrich. Palladium complex [Pd(-C3H5)Cl]2 was purchased from Fluka and Pd(CH3CN)2Cl2 was prepared according to the literature procedure.[[1]](#footnote-2)

**(*R*S)-*tert*-Butylsulfinylferrocene (2a)**.[[2]](#footnote-3) To a suspension of ferrocene (3.01 g, 16.18 mmol) in THF (7.5 mL), cooled to 0 ºC, was added dropwise a 1.7 M solution of *t*-BuLi in pentane (9.8 mL, 16.7 mmol). The reaction was stirred at 0 ºC for 20 min and it was diluted with pentane (25 mL). To the resulting mixture was slowly added a solution of a 87% ee sample of (*R*)-S*-tert*-butyl *tert*-butanethiosulfinate[[3]](#footnote-4) (1.55 g, 7.97 mmol) in pentane (5 mL) at 0 ºC. The mixture was stirred at 0 ºC for 1 h and brine (20 mL) was added. The organic layer was separated and the aqueous layer was extracted with Et2O

(2 x 20 mL). The combined organic layers were dried (MgSO4), filtered and the solvents were evaporated under reduced pressure. The residue was purified by flash chromatography (*n*-hexane-EtOAc 1:2) to afford sulfoxide (*R*)-**2a** (1.70 g, 73%) with 87% ee, as a yellow-orange solid. A single recrystallization from CH2Cl2-hexane (1:1) afforded (*R*)-**2a** (1.02 g, 60%) with >99% ee. [D20= -355 (*c* 0.5, CHCl3) {Lit.Error: Reference source not founda [D20= -339 (*c* 0.5, CHCl3), 95% ee}; mp= 150-151 ºC (Lit.Error: Reference source not found mp= 149-150 ºC); 1H NMR (200 MHz): 4.68 (m, 1H), 4.41 (m, 2H), 4.38 (s, 5H), 4.35 (m, 1H), 1.12 (s, 9H).

**(*S*S)-*p*-Tolylsulfinylferrocene (2b)**.2a,[[4]](#footnote-5) To a solution of ferrocene (9.62 g, 51.70 mmol) in THF (85 mL), cooled to 0 ºC, was slowly added a 1.7 M solution of *t*-BuLi in pentane (26.0 mL, 44.20 mmol). The solution was stirred at 0 ºC for 2 h, then it was cooled to –78 ºC and slowly transfered *via cannula* to a cold (-78 ºC) solution of (-)-(*S*)-*l*-menthyl *p*-toluenesulfinate[[5]](#footnote-6) (10.0 g, 34.00 mmol; 99% ee) in THF (51 mL). The resulting mixture was stirred at –78º C for 2 h and it was hydrolyzed with brine (100 mL). The organic layer was separated and the aqueous layer was extracted with Et2O (2 x 100 mL). The combined organic layers were dried (MgSO4), filtered and the solvents were evaporated. The residue was purified by flash chromatography (*n*-hexane-EtOAc 1:1) to afford sulfoxide (*S*)-**2b** (4.4 g, 40%) with 97% ee, as a yellow solid. A single recrystallization from *n*-hexane-Et2O 3:1 afforded sulfoxide (*S*)-**2b** (2.2 g, 50%) with >99% ee. [D20= +303 (*c* 0.5, CHCl3) {Lit.[[6]](#footnote-7)2a [D20= +305 (*c* 0.5, CHCl3), 100% ee}; mp = 143-144 ºC (Lit.[[7]](#footnote-8) mp= 142-144 ºC); 1H NMR (200 MHz): 7.52 (d, *J=* 8.3, 2H), 7.25 (d, *J=* 8.4 Hz, 2H), 4.61 (dt, *J*= 1.5, 2.3 Hz, 1H), 4.39-4.35 (m, 7H), 4.33-4.31 (m, 1H), 2.37 (s, 3H).

**General procedure for the synthesis of phosphines 3a-e**

To a solution of sulfoxide (*R*)-**2a** (0.70 g, 2.41 mmol) in THF (24 mL) was added a 1.7 M solution of *t*-BuLi in pentane (2.1 mL, 3.62 mmol). The mixture was stirred at –78 ºC for 1.5 h and the corresponding chlorophosphine (3.62 mmol) was added at -78 ºC. The reaction mixture was stirred for 30 min and it was hydrolyzed with water (20 mL). The organic layer was separated and the aqueous layer was extracted with Et2O (2 x 20 mL). The combined organic layers were dried (MgSO4), filtered and the solvents were evaporated under reduced pressure. The residue was purified by flash chromatography or by precipitation (as indicated in each case).

**(*R*Fc*, R*S)-1-(*tert*-Butylsulfinyl)-2-(diphenylphosphino)ferrocene (3a)**.[[8]](#footnote-9)4b

Chlorophosphine: PPh2Cl. Purification by flash chromatography (*n*-hexane-EtOAc 1:1). Yield: 91%, yellow solid. [D20= -437 (*c* 0.4, CHCl3) {Lit.Error: Reference source not found [D20= -303 (*c* 3.0, benzene); mp= 162-163 ºC (Lit.Error: Reference source not found mp= 162-163 ºC); 1H NMR (300 MHz): 7.61-7.52 (m, 2H), 7.35-7.28 (m, 3H,), 7.27-7.14 (m, 5H), 4.60-4.56 (m, 1H), 4.53-4.48 (m, 1H), 4.22-4.18 (m, 1H), 4.10 (s, 5H), 0.98 (s, 9H); 13C NMR (75 MHz): 140.6, 140.4, 138.8, 138.6, 135.8, 135.5, 132.9, 132.7, 129.2, 128.1, 127.9, 127.8, 90.1, 89.8, 76.5, 76.2, 75.3, 75.2, 74.0, 72.5, 71.5, 55.9, 23.7; MS *m*/*z* 474 (M+, 13), 418 (91), 352 (100), 228 (25), 170 (22).

**(*R*Fc*, R*S)-1-(*tert*-Butylsulfinyl)-2-[bis(4-fluorophenyl)phosphino]ferrocene (3b)**.

Chlorophosphine: P[(*p-*F)C6H4]2Cl.[[9]](#footnote-10)a Purification: the residue was triturated with Et2O and filtered. Yield: 66%, yellow solid. [D20= -419 (*c* 0.5, CHCl3); mp= 169-170 ºC; 1H NMR (300 MHz):  7.55 (m, 2H), 7.24 (m, 2H), 7.06 (t, *J*= 8.5 Hz, 2H), 6.94 (t, *J*= 8.5 Hz, 2H), 4.62 (bs, 1H), 4.56 (bs, 1H), 4.18 (s, 5H), 4.17 (bs, 1H), 0.99 (s, 9H).

**(*R*Fc*, R*S)-1-(*tert*-Butylsulfinyl)-2-{bis[(4-trifluoromethyl)phenyl]phosphino}ferrocene (3c)**.

Chlorophosphine: P[(*p-*CF3)C6H4]2Cl.7a Purification by flash chromatography (*n*-hexane-EtOAc 4:1). Yield: 89%, yellow solid. [D20= -302.5 (*c* 0.2, CHCl3); mp= 72-74 ºC; 1H NMR (200 MHz): 7.70 (m, 4H), 7.50 (m, 2H), 7.36 (m, 2H), 4.70 (m, 1H), 4.62 (m, 1H), 4.43 (m, 1H), 4.15 (s, 5 H), 1.04 (s, 9H); 13C NMR (75 MHz): 144.9 (d, *J*P-C= 16.7 Hz), 142.7 (d, *J*P-C= 18.8 Hz), 135.7 (d, *J*P-C= 24.1 Hz), 132.8 (d, *J*P-C= 19.9 Hz), 131.4 (q, *J*F-C= 32.4 Hz), 130.1 (q, *J*F-C= 31.6 Hz), 125.7 (d, *J*P-C= 10.5 Hz), 125.0-124.7 (m), 122.1 (d, *J*P-C= 10.5 Hz), 90.2 (d, *J*P-C= 22.0 Hz), 74.5 (d, *J*P-C= 4.2 Hz), 74.2 (d, *J*P-C= 23.0 Hz), 73.7 (d, *J*P-C= 4.2 Hz), 72.9, 71.5, 56.0, 23.5.

**(*R*Fc*, R*S)-1-(*tert*-Butylsulfinyl)-2-(difurylphosphino)ferrocene (3d)**.

Chlorophosphine: PFu2Cl.7b Purification by flash chromatography (*n*-hexane-EtOAc 4:1). Yield: 66%, yellow solid. [D20= -580 (*c* 0.2, CHCl3); mp= 158-159 ºC; 1H NMR (300 MHz): 7.70 (m, 1H), 7.52 (m, 1H), 6.90 (m, 1H), 6.65 (m, 1H), 6.42 (m, 1H), 6.25 (m, 1H), 4.83 (m, 1H), 4.55-4.45 (m, 2H), 4.18 (s, 5H), 1.00 (s, 9H); 13C NMR (75 MHz): 152.7 (d, *J*P-C= 9.4 Hz), 152.5 (d, *J*P-C= 7.3 Hz), 146.3, 146.2, 121.2 (d, *J*P-C= 31.4 Hz), 119.7 (d, *J*P-C= 27.2 Hz), 110.5 (d, *J*P-C= 8.4 Hz), 110.24 (d, *J*P-C= 7.3 Hz), 89.2 (d, *J*P-C= 22.0 Hz), 76.6, 72.8 (d, *J*P-C= 10.5 Hz), 72.3, 72.2, 71.2, 55.6, 23.1 (d, *J*P-C= 2.1 Hz); MS *m*/*z* 455 (M++H, 90), 381 (90), 331 (90). Anal. Calcd for C22H23FeO3PS: C, 58.15; H, 5.07; S, 7.05. Found: C, 57.79; H, 4.92; S, 6.80.

**(*R*Fc*, R*S)-1-(*tert*-Butylsulfinyl)-2-(dicyclohexylphosphino)ferrocene (3e)**.

Chlorophosphine: PCy2Cl. In order to avoid oxidation of the phosphine moiety, the crude mixture was used in the reduction step without further purification.

**(*S*Fc*, S*S)-2-(Diphenylphosphino)-1-(*p*-tolylsulfinyl)ferrocene (3f)**.[[10]](#footnote-11)

To solution of sulfoxide **2b** (1.0 g, 3.09 mmol) in THF (15 mL), cooled to –78 ºC, was added a 0.3 M solution of LDA in THF (13.4 mL, 4.02 mmol). The mixture was stirred at –78 ºC for 40 min and PPh2Cl (1.20 mL, 6.18 mmol) was added. The resulting solution was warmed to room temperature, stirred for 5 h and hydrolyzed with water (30 mL). The organic layer was separated and the aqueous layer was extracted with Et2O (2 x 30 mL). The combined organic layers were dried (MgSO4), filtered and the solvents were evaporated under reduced pressure. The residue was purified by flash chromatography (CH2Cl2-EtOAc 10:1) to afford the sulfoxide **3f** (0.94 g, 60%) as a yellow solid. [D20= +230 (*c* 0.2, CHCl3); mp= 187-188 ºC; 1H NMR (300 MHz): 7.53-7.37 (m, 7H), 7.20-6.88 (m, 7H), 4.62 (s, 1H), 4.46 (s, 1H), 4.20 (s, 5H), 3.95 (s, 1H), 2.24 (s, 3H); 13C NMR (75 MHz): 141.2, 140.3, 138.5 (d, *J*P-C= 8.4 Hz), 137.2 (d, *J*P-C= 9.8 Hz), 135.2 (d, *J*P-C= 21.0 Hz), 132.1 (d, *J*P-C= 18.9 Hz), 129.3, 128.2 (d, *J*P-C= 8.4 Hz), 127.7 (d, *J*P-C= 6.3 Hz), 127.2, 124.4, 99.2 (d, *J*P-C= 21.0 Hz), 77.2, 74.2 (d, *J*P-C= 4.2 Hz), 72.2, 71.2, 70.9, 21.2; MS *m*/*z* 508 (M+, 100), 492 (73), 352 (95), 228 (19), 201 (18), 121(20). Anal. Calcd for C29H25FeOPS: C, 68.51; H, 4.96; S, 6.31. Found: C, 68.18; H, 4.91; S, 6.25.

**General procedure for the reduction with HSiCl3/Et3N: synthesis of compounds 1a-f**.

To a solution of sulfoxide **3** (0.30 mmol) in toluene (4 mL), was successively added Et3N (0.4 mL, 3.00 mmol) and HSiCl3 (0.4 mL, 4.50 mmol). The mixture was heated at reflux for 12 h and it was poored into a mixture of CH2Cl2 (10 mL) and 10% aqueous solution of NaOH (10 mL). The organic layer was separated and the aqueous layer was extracted with CH2Cl2 (2 x 10 mL). The combined organic layers were dried (MgSO4), filtered and the solvents were evaporated. The residue was purified by flash chromatography.

**(*R*Fc)-2-(*tert*-Butylsulfenyl)-1-(diphenylphosphino)ferrocene (1a)**.

Starting sulfoxide: **3a**. Chromatography: *n*-hexane-EtOAc 5:1. Yield: 79%, yellow solid. [D20= -200 (*c* 0.5, CHCl3); mp= 148-149 ºC; 1H NMR (300 MHz):  7.68-7.58 (m, 2H), 7.39-7.28 (m, 5H), 7.28-7.20 (m, 3H), 4.71-4.67 (m, 1H), 4.50-4.46 (m, 1H), 4.15-4.12 (m, 1H), 3.98 (s, 5H), 1.00 (s, 9H); 13C NMR (75 MHz): 139.9, 138.3, 135.3, 135.0, 133.0, 132.7, 128.9, 127.9, 83.1, 81.0, 80.0, 73.4, 71.5, 70.6, 46.0, 31.0; MS *m*/*z* 458 (M+, 95), 402 (100), 337 (52), 302 (11), 217 (27), 170 (31), 121 (10). Anal. Calcd for C26H27FePS: C, 68.17; H, 5.94; S, 7.00. Found: C, 67.78; H, 6.10; S, 6.75.

**(*R*Fc)-2-(*tert*-Butylsulfenyl)-1-[bis(4-fluorophenyl)phosphino]ferrocene (1b)**.

Starting sulfoxide: **3b**. Chromatography: *n*-hexane-EtOAc 40:1. Yield: 85%, yellow solid. [D20= -217 (*c* 0.5, CHCl3); mp= 125-126 ºC; 1H NMR (300 MHz):  7.58 (m, 2H), 7.30 (m, 2H), 7.07 (t, *J*= 8.5 Hz, 2H), 6.95 (t, *J*= 8.5 Hz, 2H), 4.71 (m, 1H), 4.49 (t, *J*= 2.4 Hz, 1H), 4.06 (m, 1H), 4.00 (s, 5H), 0.98 (s, 9H); 13C NMR (75 MHz): 165.0, 164.5, 161.7, 161.2, 137.0, 136.9, 136.7, 136.6, 135.4, 135.3, 134.8, 134.7, 134.5, 134.4, 133.7, 133.6, 133.5, 115.4, 115.3, 115.1, 115.0, 114.9, 83.4, 82.9, 80.7, 80.6, 80.2, 72.9, 72.8, 71.7, 70.7, 46.1, 31.0.

**(*R*Fc)-2-(*tert*-Butylsulfenyl)-1-{bis[(4-trifluoromethyl)phenyl]phosphino}ferrocene (1c)**.

Starting sulfoxide: **3c**. Chromatography: *n*-hexane-EtOAc 10:1. Yield: 70%, yellow solid. [D20= -218 (*c* 0.2, CHCl3); mp= 74-75 ºC; 1H NMR (300 MHz): 7.75 (t, *J*= 7.6 Hz, 2H), 7.65 (d, *J*= 7.5 Hz, 2H), 7.52 (d, *J*= 7.9 Hz, 2H), 7.43 (t, *J*= 7.2 Hz, 2H), 4.78 (m, 1H), 4.56 (dt, *J*= 0.4, 2.6 Hz, 1H), 4.09 (dd, *J*= 1.4, 2.8 Hz, 1H), 3.99 (s, 5H), 1.03 (s, 9H); 13C NMR (75 MHz): 144.5 (d, *J*P-C= 14.6 Hz), 142.6 (d, *J*P-C= 11.5 Hz), 135.4 (d, *J*P-C= 23.0 Hz), 132.8 (d, *J*P-C= 18.8 Hz), 131.2 (q, *J*F-C= 32.4 Hz), 130.1 (q, *J*F-C= 32.1 Hz), 125.7 (d, *J*P-C= 7.3 Hz), 124.1-125.9 (m), 122.1 (d, *J*P-C= 7.3 Hz), 83.7 (d, *J*P-C= 34.5 Hz), 80.4 (d, *J*P-C= 3.1 Hz), 78.6 (d, *J*P-C= 4.2 Hz), 72.8 (d, *J*P-C= 5.2 Hz), 72.2, 70.7, 46.1, 30.9; MS *m/z*  594 (M+, 30), 538 (100), 217 (80).

**(*R*Fc)-2-(*tert*-Butylsulfenyl)-1-(difurylphosphino)ferrocene (1d)**.

Starting sulfoxide: **3d**. Chromatography: *n*-hexane-EtOAc 10:1. Yield: 86%, yellow solid. [D20= -389 (*c* 0.15, CHCl3); mp= 104-106 ºC; 1H NMR (300 MHz):  7.70 (m, 1H), 7.53 (m, 1H), 6.90 (t, *J*= 3.0 Hz, 1H), 6.60 (m, 1H), 6.45 (m, 1H), 6.29 (m, 1H), 4.77 (dd, *J*= 1.4, 2.8 Hz, 1H), 4.58 (m, 1H), 4.47 (t, *J*= 2.6 Hz, 1H), 4.00 (s, 5H), 1.05 (s, 9H); 13C NMR (75 MHz): 152.7 (d, *J*P-C= 10.5 Hz), 152.6 (d, *J*P-C= 12.5 Hz), 146.6, 146.3 (d, *J*P-C= 2.1 Hz), 120.9 (d, *J*P-C= 29.3 Hz), 119.4 (d, *J*P-C= 23.0 Hz), 110.6 (d, *J*P-C= 7.3 Hz), 110.4 (d, *J*P-C= 6.3 Hz), 82.8 (d, *J*P-C= 37.7 Hz), 79.3 (d, *J*P-C= 4.2 Hz), 78.3 (d, *J*P-C= 9.4 Hz), 75.1 (d, *J*P-C= 6.3 Hz), 71.8, 70.6, 46.0, 30.7; MS *m*/*z* 439(M++H, 60), 371 (60); Anal. Calcd for C22H23FePS: C, 60.27; H, 5.25; S, 7.30. Found: C, 60.13; H, 5.09; S, 6.84.

**(*R*Fc)-2-(*tert*-Butylsulfenyl)-1-(dicyclohexylphosphino)ferrocene (1e)**.

Starting sulfoxide: **3e**. Chromatography: *n*-hexane-EtOAc 10:1. Yield: 88% (overall yield from **2a**). [D20= +731 (*c* 0.12, CHCl3); mp= 108-110 ºC; 1H NMR (200 MHz):  4.66 (m, 1H), 4.39 (t, *J*= 2.6 Hz, 1H), 4.20 (m, 1H), 4.15 (s, 5H), 2.20-1.10 (m, 21H), 1.30 (s, 9H); 13C NMR (50 MHz): 83.2 (d, *J*P-C= 22.7 Hz), 82.5 (d, *J*P-C= 19.9 Hz), 77.1, 73.2 (d, *J*P-C= 2.8 Hz), 70.7, 70.1, 46.0, 36.5 (d, *J*P-C= 14.2 Hz), 35.4 (d, *J*P-C= 12.8 Hz), 32.7 (d, *J*P-C= 19.9 Hz), 32.2 (d, *J*P-C= 17.0 Hz), 31.6, 30.2 (d, *J*P-C= 7.1 Hz), 29.9 (d, *J*P-C= 8.5 Hz), 28.0 (d, *J*P-C= 4.3 Hz), 27.7 (d, *J*P-C= 2.8 Hz), 27.4, 27.3, 27.2, 26.4; MS *m*/*z* 471(M++H, 90), 415 (150), 332 (150), 218 (150). Anal. Calcd for C26H39FePS: C, 66.38; H, 8.30; S, 6.81. Found: C, 66.29; H, 8.10; S, 6.52.

**(*S*Fc)-1-(Diphenylphospino)-2-(*p*-tolylsulfenyl)ferrocene (1f)**.

Starting sulfoxide: **3f**. Chromatography: *n*-hexane-EtOAc 2:1. Yield: 80%, yellow solid. [D20= +136 (*c* 0.15, CHCl3); mp= 130-131 ºC; 1H NMR (300 MHz):  (m, 5H), (m, 5H), 6.83 (d, *J*= 7.9 Hz, 2H), 6.68 (d, *J*= 7.9 Hz, 2H), 4.72 (s, 1H), 4.45 (s, 1H), 4.17 (s, 5H), 3.90 (s, 1H), 2.14 (s, 3H); 13C NMR:  139.4 (d, *J*P-C= 10.5 Hz), 138.5 (d, *J*P-C= 10.5 Hz), 136.0, 135.9, 135.5 (d, *J*P-C= 21.1 Hz), 133.5 (d, *J*P-C= 18.9 Hz), 129.7 (d, *J*P-C= 4.0 Hz), 129.4, 128.4, 128.3, 84.8 (d, *J*P-C= 29.5 Hz), 78.6, 73.4 (d, *J*P-C= 4.2 Hz), 72.0 (d, *J*P-C= 27.4 Hz), 71.4, 71.1, 20.9; MS *m*/*z* 492 (M+, 100), 352 (12), 170 (13), 121(12). Anal. Calcd for C29H25FeOPS: C, 70.74; H, 5.12; S, 6.51. Found: C, 70.58; H, 5.41; S, 6.13.

**General procedure for the palladium-catalyzed allylic alkylation with dimethyl malonate. Synthesis of (*R*, *E*)-methyl 2-carbomethoxy-3,5-diphenylpent-4-enoate [(*R*)-4].**[[11]](#footnote-12)

A mixture of ligand **1** (0.02 mmol), [Pd(3-C3H5)Cl]2 (2.3 mg, 0.01 mmol) [and Bu4NCl (8.8 mg, 0.03 mmol) when it was used] in dry CHCl3 (1 mL) was stirred at room temperature for 1 h and it was treated with a solution of 1,3-diphenyl-2-propenyl acetate (80.0 mg, 0.32 mmol) in dry CHCl3 (1 mL). To the resulting mixture were successively added *N,O*-bis(trimethylsilyl)acetamide (237 **L, 0.96 mmol) and dimethyl malonate (108 **L, 0.96 mmol). The reaction was monitored by TLC until the starting material was consumed. Then it was diluted with ether, washed with saturated aqueous NH4Cl solution, and the organic phases were dried over MgSO4, filtered and the solvents were evaporated under reduce pressure. The residue was purified by flash chromatography (*n*-hexane:EtOAc 7:1) to afford (*R*)-**4** as a colorless oil. The absolute configuration of the product was assigned by comparing the sign of its specific rotation with literature data.9 1H NMR (200 MHz): δ 7.34-7.20 (m, 10H), 6.49 (d, *J*= 16.1 Hz, 1H), 6.33 (dd, *J*= 8.1, 15.6 Hz, 1H), 4.27 (dd, *J*= 8.1, 10.7 Hz, 1H), 3.96 (d, *J*= 10.7 Hz, 1H), 3.71 (s, 3H), 3.52 (s, 3H).

**General procedure for palladium-catalyzed allylic amination with benzylamine. Synthesis of (*S*, *E*)-*N*-benzyl-(1,3-diphenyl-2-propenyl)amine [(*S*)-5]**.[[12]](#footnote-13)

A mixture of ligand **1** (0.02 mmol) and [Pd(3-C3H5)Cl]2 (2.3 mg, 0.01 mmol) in THF (1 mL) was stirred at room temperature for 1 h and it was treated with a solution of 1,3-diphenyl-2-propenyl acetate (80.0 mg, 0.32 mmol) in THF (1 mL). To the resulting mixture was added benzylamine (105 **L, 0.96 mmol). The reaction was monitored by TLC until the starting material was consumed. Then it was diluted with ether, washed with saturated aqueous NH4Cl solution, and the organic phases were dried over MgSO4, filtered and the solvents were evaporated under reduced pressure. The residue was purified by flash chromatography (*n*-hexane-EtOAc 7:1) to afford (*S*)-**5** as a colorless oil. The absolute configuration of the product was assigned by comparing the sign of its specific rotation with literature data.10 1H NMR (200 MHz):  7.52-7.29 (m, 15 H), 6.65 (d, *J*= 16.1 Hz, 1H), 6.40 (dd, *J*= 7.0, 15.6 Hz, 1H), 4.46 (d, *J*= 7.5 Hz, 1H), 3.84 (s, 2H), 1.82 (bs, 1H).

**General procedure for palladium-catalyzed allylic amination with potassium phthalimide. Synthesis of 1-(*N*-phthaloyl)-1,3-diphenylprop-2-ene [(*S*)-6]** [[13]](#footnote-14)

A mixture of ligand **1** (0.02 mmol) and [Pd(3-C3H5)Cl]2 (2.3 mg, 0.01 mmol) in dry CHCl3 (1 mL) was stirred at room temperature for 1 h and it was transferred *via cannula* into a suspension of potassium phthalimide (177.8 mg, 0.96 mmol) in dry CHCl3 (1 mL). The resulting mixture was treated with a solution of 1,3-diphenyl-2-propenyl acetate (80.0 mg, 0.32 mmol) in dry CHCl3 (1 mL). The reaction was monitored by TLC until the starting material was consumed. Then it was diluted with ether, washed with saturated aqueous NH4Cl solution, and the organic phases were dried over MgSO4, filtered and the solvents were evaporated under reduced pressure. The residue was purified by flash chromatography (*n*-hexane-EtOAc 9:1) to afford (*S*)-**6** as a yellow solid. The absolute configuration of the product was assigned by comparing the sign of its specific rotation with literature data.11 1H NMR (200 MHz): δ 7.87-7.25 (m, 14H), 7.08 (dd, *J*= 8.6, 16.1 Hz, 1H), 6.72 (d, *J*= 16.1 Hz, 1H), 6.13 (d, *J*= 8.6 Hz, 1H).

**General procedure for palladium-catalyzed reaction of oxabenzonorbornadiene with dialkylzinc reagents. Synthesis of (1*R*, 2*R*)-2-ethyl-1,2-dihydronaphth-1-ol [7a]** [[14]](#footnote-15) **and (1*R*, 2*R*)-2-methyl-1,2-dihydronaphth-1-ol [7b].**12

A mixture of ligand **1** (0.01 mmol) and Pd(CH3CN)2Cl2 (2.6 mg, 0.01 mmol) in dry toluene (1 mL) was stirred at room temperature for 1.5 h. The solution was diluted with dry toluene (2 ml) and it was treated with a 1M solution of Et2Zn in hexane (0.30 mmol), or a 2M solution of Me2Zn in toluene (0.30 mmol). The mixture was stirred at room temperature for 5 min and a solution of oxabenzonorbornadiene (28.8 mg, 0.20 mmol) in dry toluene (3 ml) was added. The reaction was monitored by TLC until the starting material was consumed (usually 18-24 h). Then a few drops of brine were added and the solution was stirred at room temperature for 0.5 h, it was filtered through celite and the solvents were evaporated. The residue was purified by flash chromatography (*n*-hexane-EtOAc 12:1) to afford **7** as a white solid. (-)-**7a**: 1H NMR (200 MHz):  7.36-7.24 (m, 3H), 7.14 (d, *J*= 7.0 Hz, 1H), 6.55 (dd, *J*= 2.7, 9.7 Hz, 1H), 5.84 (dd, *J*= 1.6, 9.1 Hz, 1H), 4.63-4.58 (m, 1H), 2.44-2.34 (m, 1H), 1.92-1.53 (m, 3H), 1.10 (t, *J*= 7.5 Hz, 3H). (-)-**7b**: 1H NMR (200 MHz):  7.38-7.23 (m, 3H), 7.12 (d, *J*= 8.6 Hz, 1H), 6.51 (dd, *J*= 2.1, 9.1 Hz, 1H), 5.80 (dd, *J*= 2.7, 9.1 Hz, 1H), 4.52-4.59 (m, 1H), 2.67-2.62 (m, 1H), 1.61 (d, *J*= 7.0 Hz, 1H), 1.24 (t, *J*= 7.5 Hz, 3H).

**Synthesis of Complex (1a)·PdCl2**: To a solution of **1a** (100 mg, 0.22 mmol) in CH2Cl2 (10 mL) was added a solution of Pd(CH3CN)2Cl2 (57 mg, 0.22 mmol) in CH2Cl2 (3 mL). The mixture was stirred 15 min and then it was concentrated to dryness. The solid was recrystalized from CH2Cl2-Et2O to afford **(1a)·PdCl2** (100 mg, 72%) as orange crystals. [D20= -235 (*c* 0.2, CHCl3); mp> 200 ºC (decomp); 1H NMR (300 MHz):  8.03-7.82 (m, H), 7.55-7.30 (m, H), 4.92 (m, 1H), 4.87 (m, 1H), 4.34 (m, 1H), 4.14 (s, 5H), 1.32 (s, 9H); 13C NMR (75 MHz): 134.6, 134.4, 132.8, 132.6, 132.0, 131.7, 131.6, 130.9, 130.0, 129.1, 129.0, 128.8, 128.5, 128.3, 86.0, 83.6, 80.3, 80.2, 74.9, 74.8, 72.6, 71.9, 59.1, 30.9. Anal. Calcd for C26H27Cl2FePPdS: C, 49.12; H, 4.28. Found: C, 48.76; H, 4.55.

**DETERMINATION OF ENANTIOMERIC EXCESSES**

| Entry | Compound | **Column** | **Hexane/*i*-PrOH** | **Flow rate**  **(mL/min)** | **(*+*)-(min)** | **(*-*)-(min)** |
| --- | --- | --- | --- | --- | --- | --- |
| 1 | **1a** | Chiralcel OD | 99.8:0.2 | 0.50 | 26.1 | 22.0 |
| 2 | **1c** | Chiralcel OD | 99.9:0.1 | 0.20 | 29.3 | 43.0 |
| 3 | **1d** | Chiralcel OD | 99.8:0.2 | 0.50 | 18.2 | 12.7 |
| 4 | **1e** | Chiralcel OD | 99.8:0.2 | 0.50 | 7.7 | 7.3 |
| 5 | **1f** | Chiralcel OD | 98:2 | 0.50 | 21.7 | 14.6 |
| 7 | **2a** | Chiralcel OD | 98:2 | 0.70 | 24.3 | 19.3 |
| 8 | **2b** | Chiralcel OD | 90:10 | 0.80 | 15.1 | 13.7 |
| 9 | **4** | Chiralcel OD | 98:2 | 0.20 | 44.8 | 47.2 |
| 10 | **5** | Chiralpak AD | 98:2 | 0.50 | 18.0 | 16.5 |
| 11 | **6** | Chiralcel OD | 98:2 | 0.50 | 19.0 | 24.4 |
| 12 | **7a** | Chiralcel OD | 98:2 | 0.60 | 24.4 | 22.0 |
| 13 | **7b** | Chiralcel OD | 99:1 | 0.40 | 26.5 | 25.1 |

1. B. B. Wayland and R. F. Schramm, *Inorg. Chem*., 1969, **8**, 971. [↑](#footnote-ref-2)
2. a) N. M. Lagneau, Y. Chen, P. M. Robben, H.-S. Sin, K. Takasu, J.-S. Chen, P. D. Robinson and D. H. Hua, *Tetrahedron,* 1998, **54**, 7301. b) P. Diter, O. Samuel, S. Taudien and H. B. Kagan, *Tetrahedron: Asymmetry,* 1994, **5**, 549. [↑](#footnote-ref-3)
3. D. A. Cogan, G. Liu, K. Kim, B. J. Backes and J. A. Ellman, *J. Am. Chem. Soc.,* 1998, **120**, 8011. [↑](#footnote-ref-4)
4. a) G. Argouarch, O. Samuel, O. Riant, J.-C. Daran and H. B. Kagan, *Eur. J. Org. Chem.,*2000, 2893. b) O. Riant, G. Argouarch, D. Guillaneux, O. Samuel and H. B. Kagan, *J. Org. Chem.,*1998, **63**, 3511. [↑](#footnote-ref-5)
5. G. Solladié, J. Hutt and A. Girardin, *Synthesis,* 1987, 173. [↑](#footnote-ref-6)
6. 2a N. M. Lagneau, Y. Chen, P. M. Robben, H.-S. Sin, K. Takasu, J.-S. Chen, P. D. Robinson and D. H. Hua, *Tetrahedron,* 1998, **54**, 7301. [↑](#footnote-ref-7)
7. D. Guillaneux and H. B. Kagan, *J. Org. Chem.,* 1995, **60**, 2502. [↑](#footnote-ref-8)
8. 4b O. Riant, G. Argouarch, D. Guillaneux, O. Samuel and H. B. Kagan, *J. Org. Chem.,*1998, **63**, 3511. [↑](#footnote-ref-9)
9. a) A. L. Casalnuovo, T. V. RajanBabu, T. A. Ayers and T. H. Warren, *J. Am. Chem. Soc.,* 1994, **116**, 9869. b) N. G. Andersen, R. McDonald and B. A. Keay, *Tetrahedron: Asymmetry,* 2001, **12**, 263. [↑](#footnote-ref-10)
10. The phosphine **3f** has been previously described as its borane complex: O. Riant, G. Argouarch, D. Guillaneux, O. Samuel and H. B. Kagan, *j. Org. Chem.,* 1998, **63**, 3511. [↑](#footnote-ref-11)
11. J. Sprinz and G. Helmchen, *Tetrahedron Lett*., 1993, **34**, 1769. [↑](#footnote-ref-12)
12. T. Hayashi, A. Yamamoto, T. Hagihara and Y. Ito, *Tetrahedron Lett.,* 1986, **27**, 191. [↑](#footnote-ref-13)
13. A. Sudo and K. Saigo, *J. Org. Chem.,* 1997, **62**, 5508. [↑](#footnote-ref-14)
14. M. Lautens, J.-L. Renaud and S. Hiebert, *J. Am. Chem. Soc.,* 2000, **122**, 1804. [↑](#footnote-ref-15)
